# Supplementary material for: The psychological impact of a dual-disaster caused by earthquakes and radioactive contamination in Ichinoseki after the Great East Japan Earthquake
Source: PubMed Central journal article supplement (PMC4037272; doi:10.1186/1756-0500-7-307), 2014-05-20
Supplement: 1756-0500-7-307-S1.pdf [file 1756-0500-7-307-S1.pdf]

**Supplementary Table 1. Population and number of households in Ichinoseki city separated by subarea as of Oct 1st, 2010.**

|                | Household number (household) | Population (person) |        |        |
|----------------|------------------------------|---------------------|--------|--------|
|                |                              | Total               | Male   | Female |
|                | 42,633                       | 127,642             | 61,301 | 66,341 |
| <b>Subarea</b> |                              |                     |        |        |
| Ichinoseki     | 21,879                       | 60,015              | 28,833 | 31,182 |
| Hanaizumi      | 4,281                        | 14,350              | 6,798  | 7,552  |
| Daitou         | 4,873                        | 15,313              | 7,344  | 7,969  |
| Senmaya        | 3,891                        | 11,960              | 5,772  | 6,188  |
| Higashiyama    | 2,195                        | 7,445               | 3,569  | 3,876  |
| Murone         | 1,627                        | 5,492               | 2,659  | 2,833  |
| Kawasaki       | 1,193                        | 4,003               | 1,910  | 2,093  |
| Fujisawa       | 2,694                        | 9,064               | 4,416  | 4,648  |

**Reference:** Ichinoseki City Government. The statistical directory of Ichinoseki city in 2011: Population and Households. [Cited June 20, 2013] Available from [<http://www.city.ichinoseki.iwate.jp/index.cfm/7,29044,c,html/29044/20120418-115859.xls>] (In Japanese)
